# Supplementary material for: GRaNIE and GRaNPA: inference and evaluation of enhancer‐mediated gene regulatory networks
Source: Mol Syst Biol. 2023 Apr 19;19(6):e11627. doi: 10.15252/msb.202311627 (PMC10258561; doi:10.15252/msb.202311627)
Supplement: Supplementary file 1 — Appendix [file MSB-19-e11627-s009.pdf]

# Appendix

## Content:

- 2 - [Appendix Figure S1](#)
- 3 - [Appendix Figure S2](#)
- 3 - [Appendix Figure S3](#)
- 4 - [Appendix Figure S4](#)
- 5 - [Appendix Figure S5](#)
- 5 - [Appendix Figure S6](#)
- 6 - [Appendix Figure S7](#)
- 7 - [Appendix Figure S8](#)
- 8 - [Appendix Figure S9](#)
- 9 - [Appendix Figure S10](#)
- 9 - [Appendix Figure S11](#)
- 10 - [Appendix Figure S12](#)
- 10 - [Appendix Figure S13](#)
- 11 - [Appendix Figure S14](#)
- 12 - [Appendix Figure S15](#)
- 13 - [Appendix Figure S16](#)
- 14 - [Appendix Figure S17](#)
- 15 - [Appendix Figure S18](#)
- 16 - [Appendix Figure S19](#)
- 17 - [Appendix Figure S20](#)

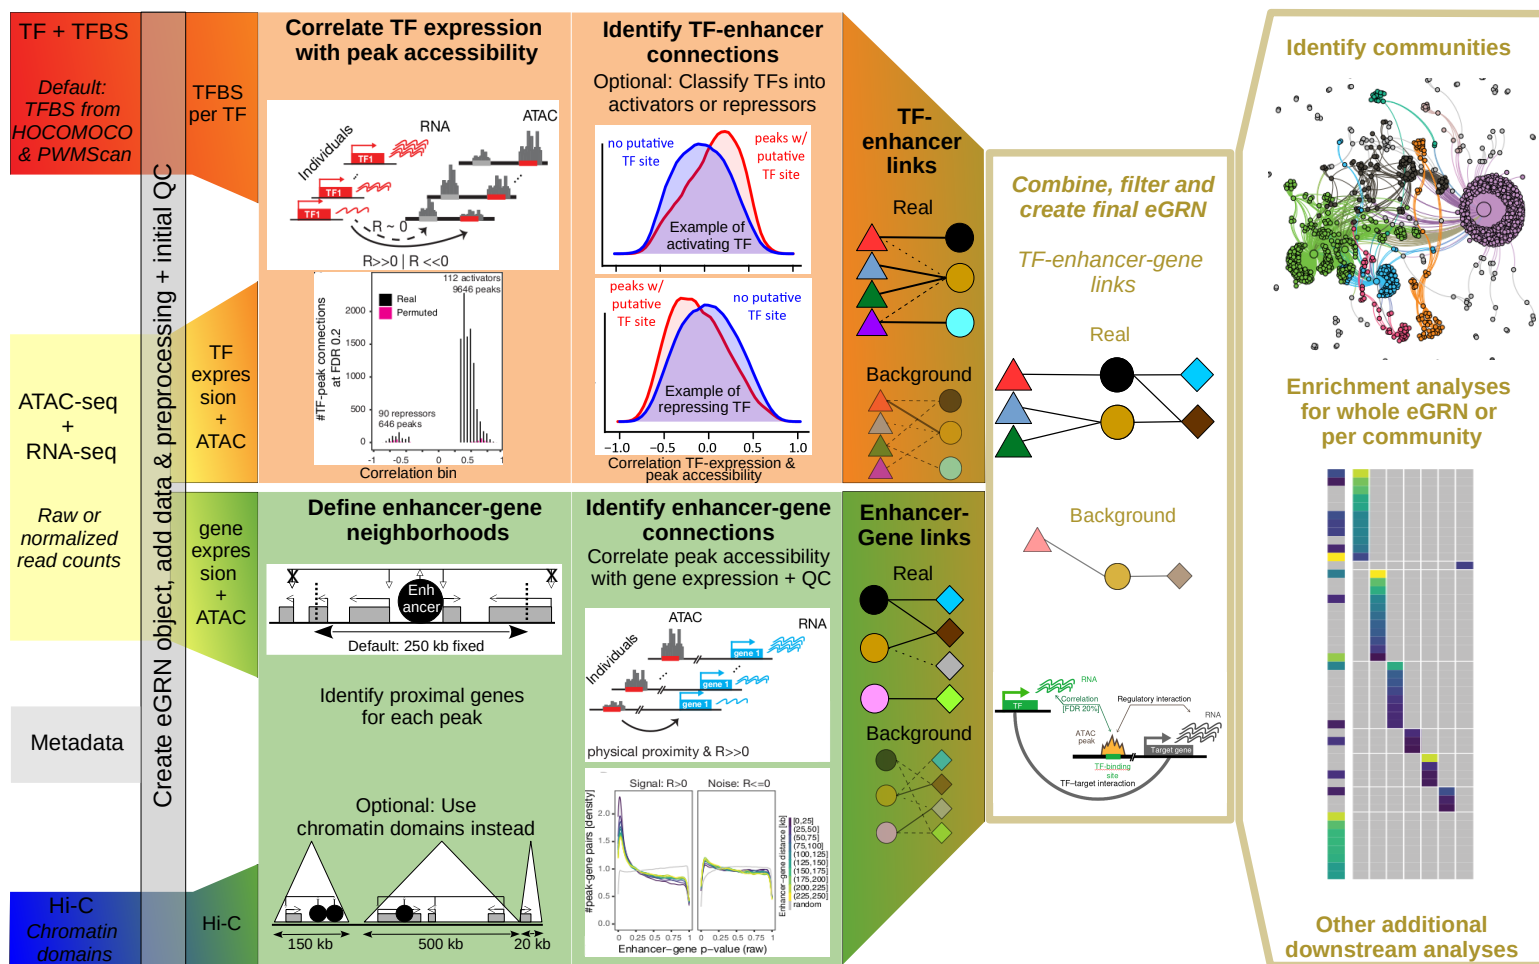

**Appendix Figure S1:** Detailed graphical workflow of *GRaNIe*. Input for the package is highlighted at the left side, which includes mandatory and optional (Hi-C data) input. For methodological details, see the main text and Methods.

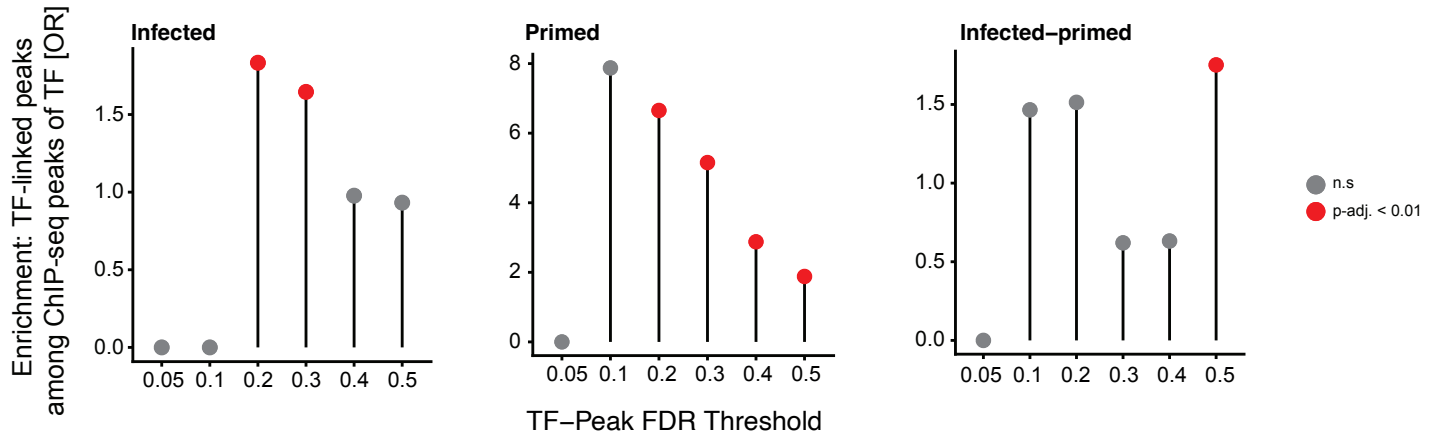

**Appendix Figure S2:** Validation of the eGRN TF-peak links with ChIP-seq data. Enrichment of ChIP-seq peaks overlapping a GRaNIIE-inferred TF-bound peak (same TF) are shown for different TF-peak FDRs in the infected (left), primed (middle) and primed-infected (right) macrophage eGRNs. Background: peaks that contain the motif for the respective TF but are not significantly linked.

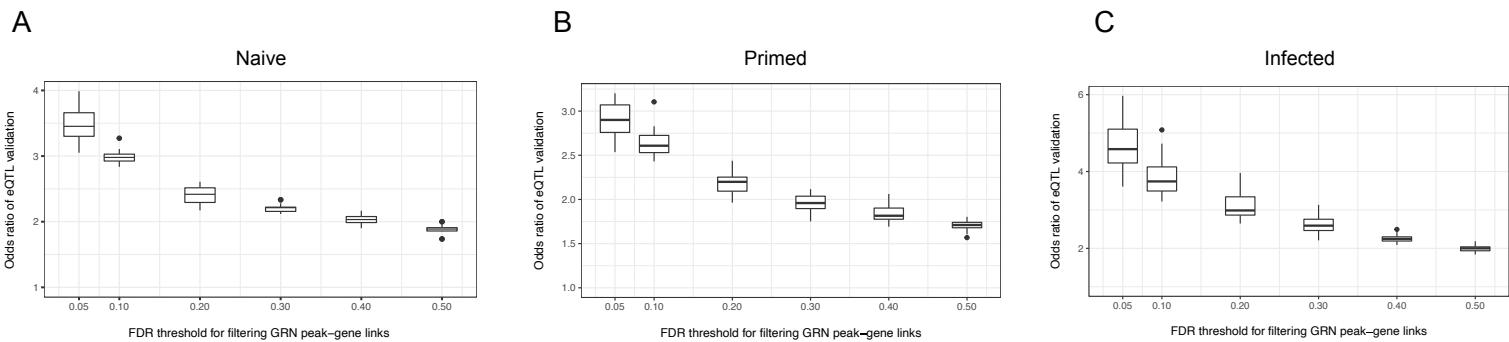

**Appendix Figure S3:** Validation of the eGRN peak-gene links with macrophage eQTLs. Plots show the enrichment of eGRN links overlapping an eQTL over randomly sampled distance-matched peak-gene links overlapping an eQTL for different peak-gene FDRs in the primed (left), infected (middle) and primed-infected (right) macrophage eGRN.

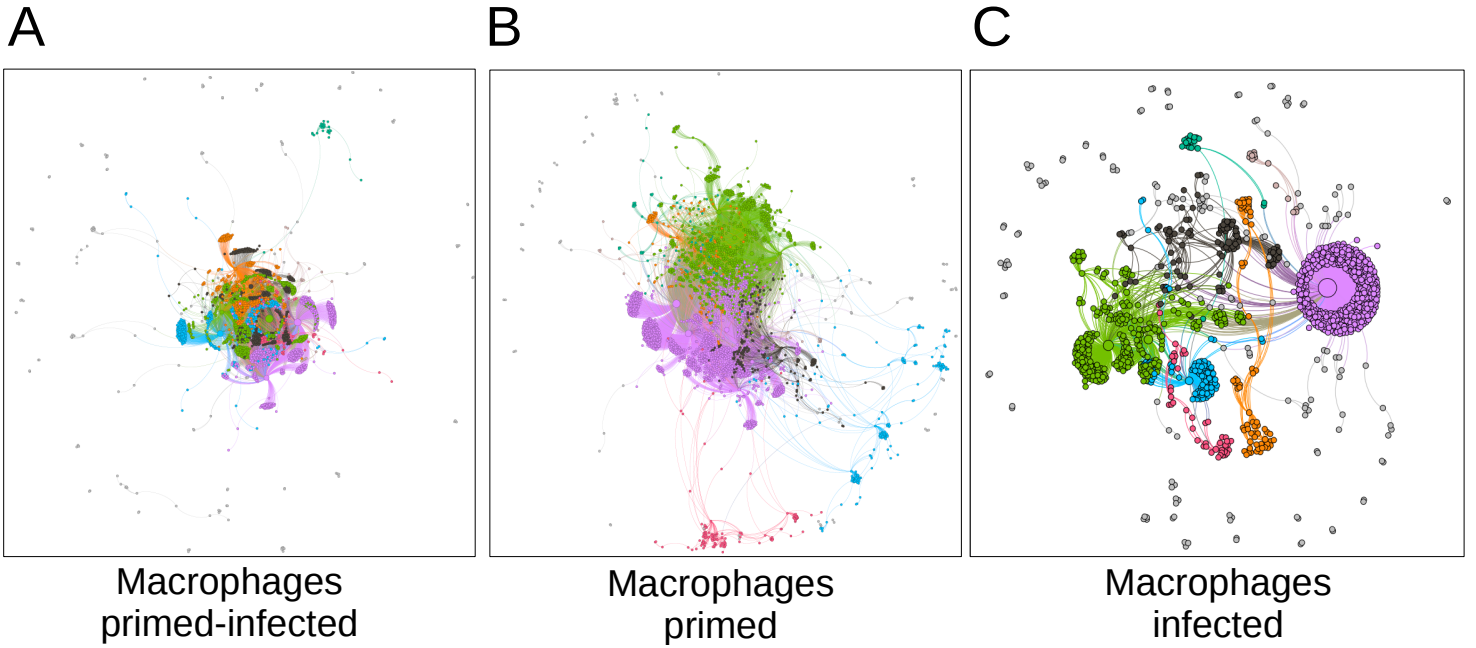

**Appendix Figure S4:** Network visualizations and community identification of the other Macrophage eGRNs described in this manuscript in analogy to **Fig. 1E** using a forced-directed visualization. The colors correspond to the identified network communities.

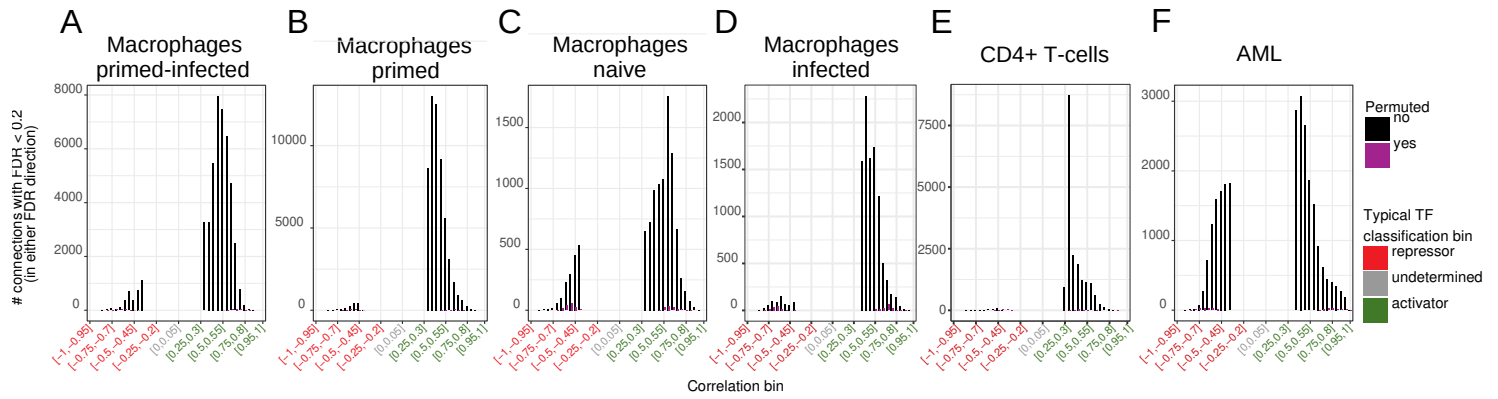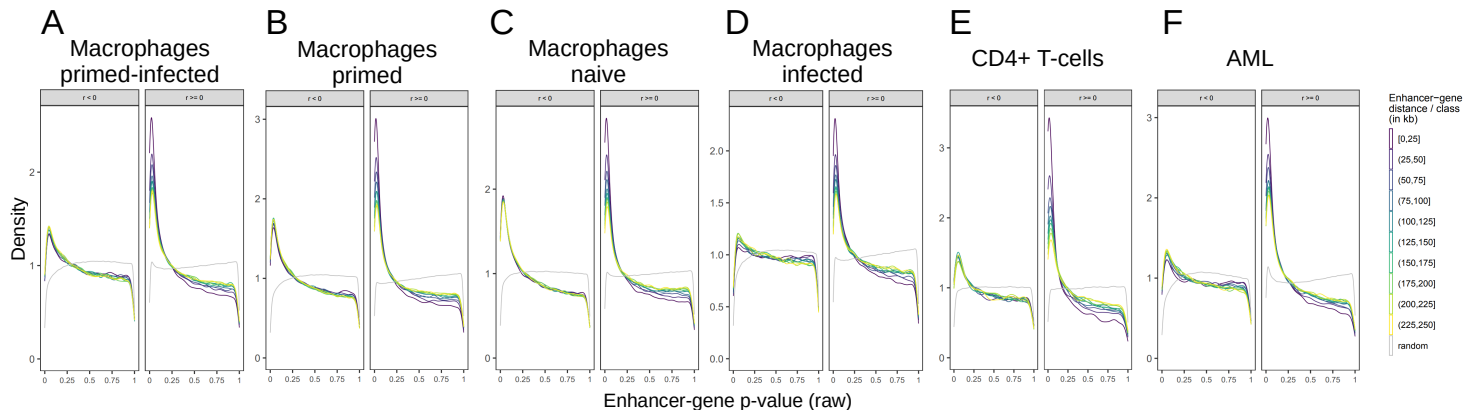

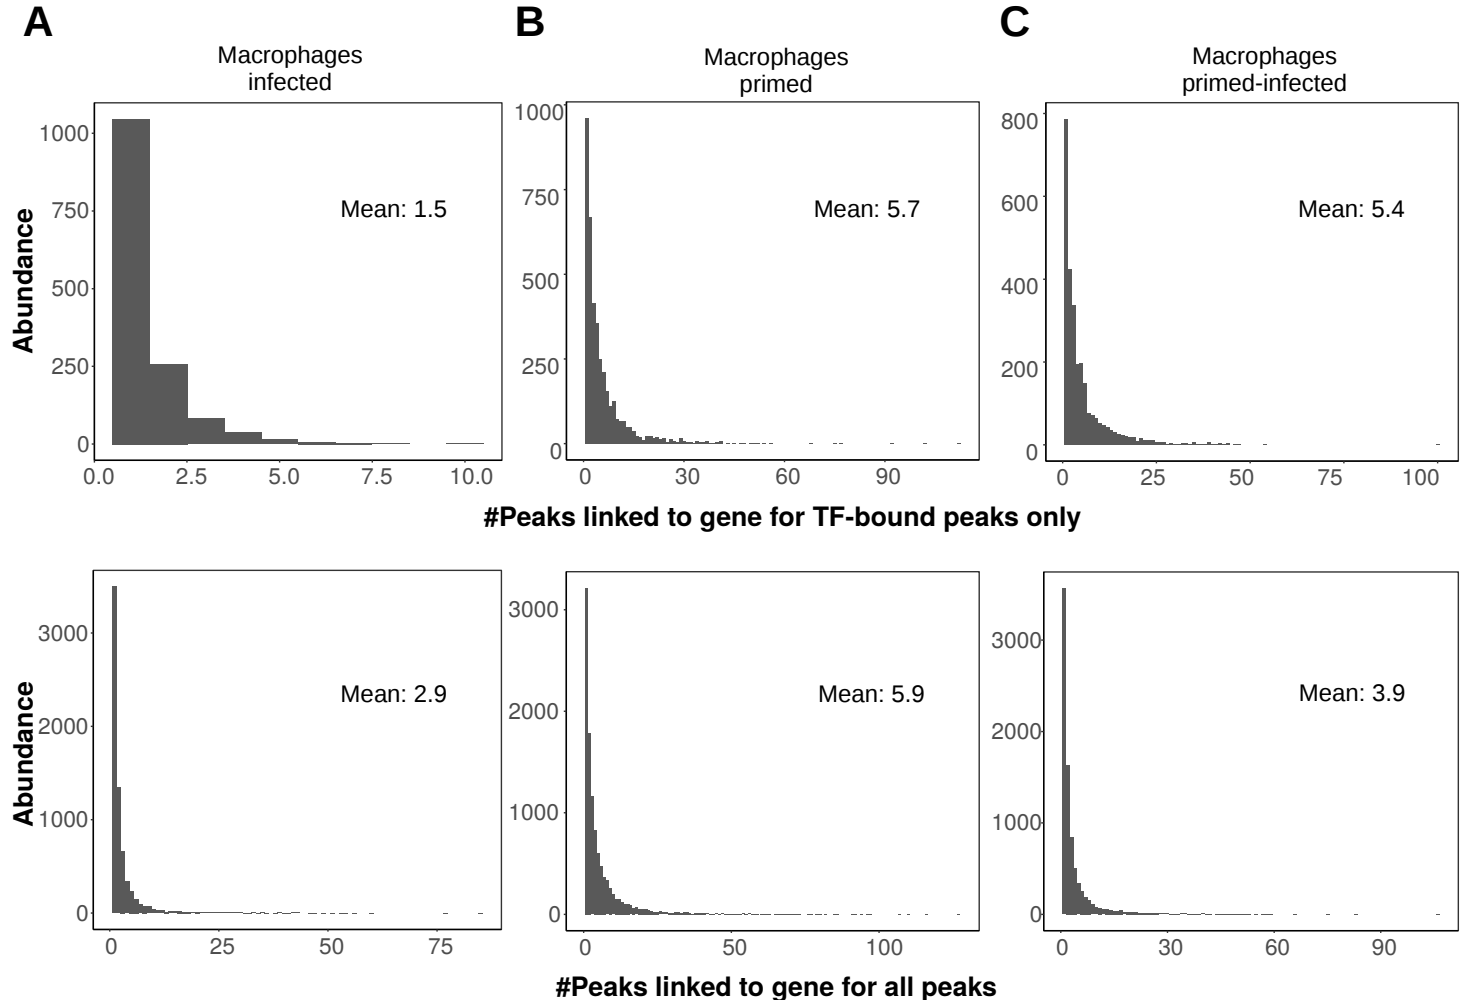

**Appendix Figure S7:** Histograms of the number of peaks linked to a gene for the various macrophage eGRNs, along with their mean value. The upper row counts peaks only if they are TF-bound (i.e., as GRaNIE outputs them as proper TF-peak-gene connections), while the lower row includes all peaks (i.e., also those not connected to a TF, focusing therefore on all significant TF-gene connections and ignoring the TF-peak FDR).

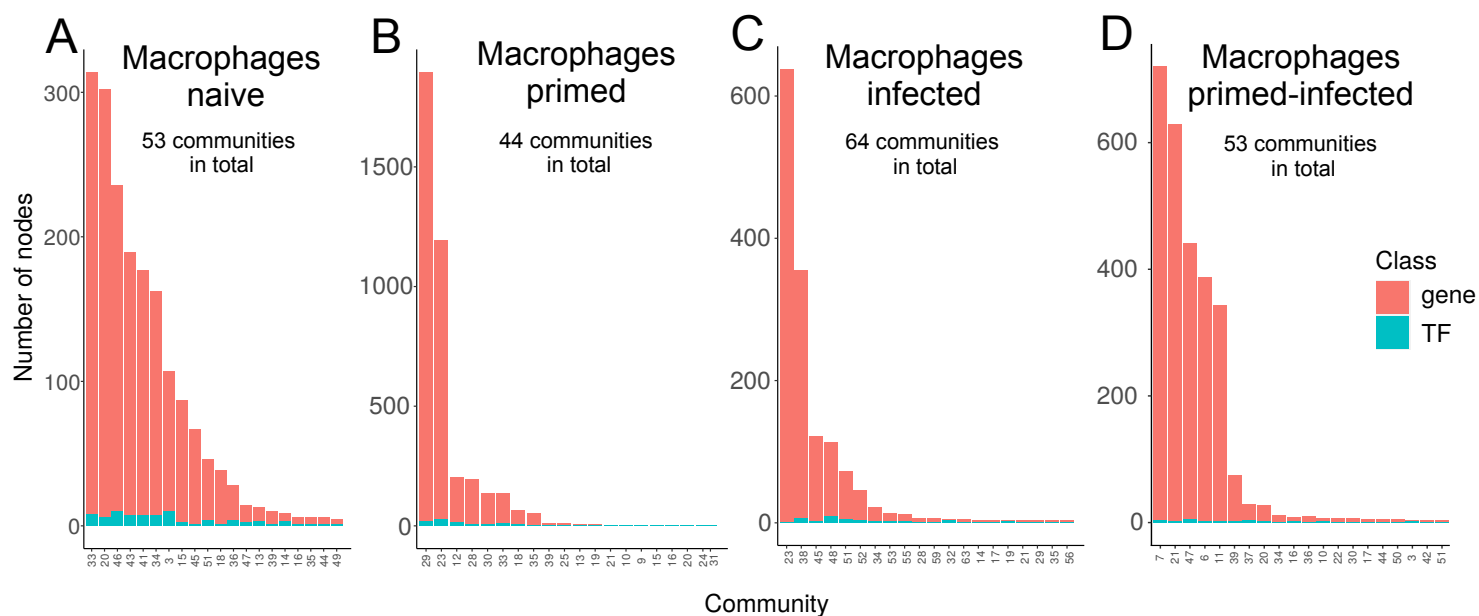

**Appendix Figure S8.** Community sizes for the different macrophage eGRNs with respect to the number of genes and TFs per community.



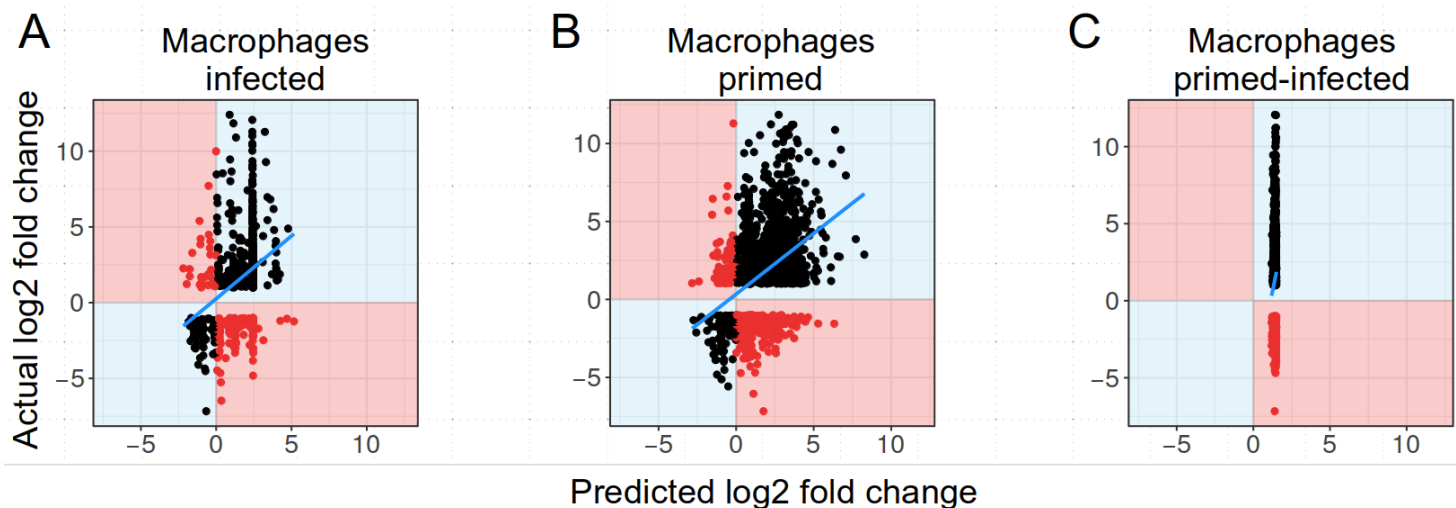

**Appendix Figure S10.** True vs predicted (using GRaNPA) log2-fold changes for the macrophage expression response to salmonella infection are shown as scatter plot for three macrophage eGRNs, in analogy to **Fig. 2B**. For A and B, GRaNPA is able to predict the response, while this is not the case for C.

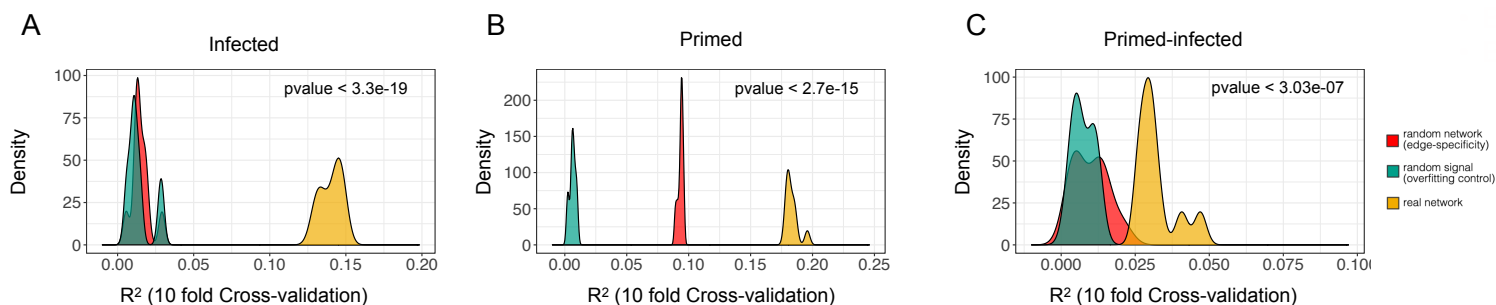

**Appendix Figure S11:** Output of GRaNPA in analogy to **Fig. 2C** for infected (A), primed (B) and primed-infected (C) macrophage eGRNs. Distributions of  $R^2$  for 10 random forest runs for predicting differential expression upon salmonella infection are shown as a density plot.

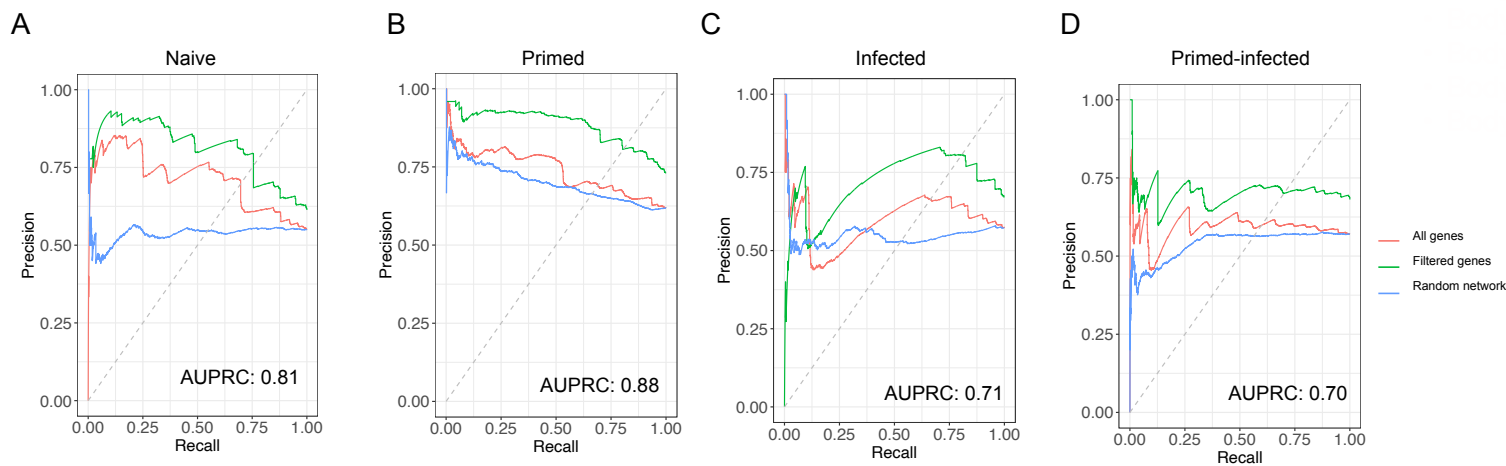

**Appendix Figure S12:** Output of GRaNPA for classification of direction of differential expression data for different macrophage eGRNs (precision-recall curve). Random forest classification has been trained on the real network predicting all genes (red), the real network predicting genes with absolute log-fold change > 1 (green) and the random network predicting all genes (blue).

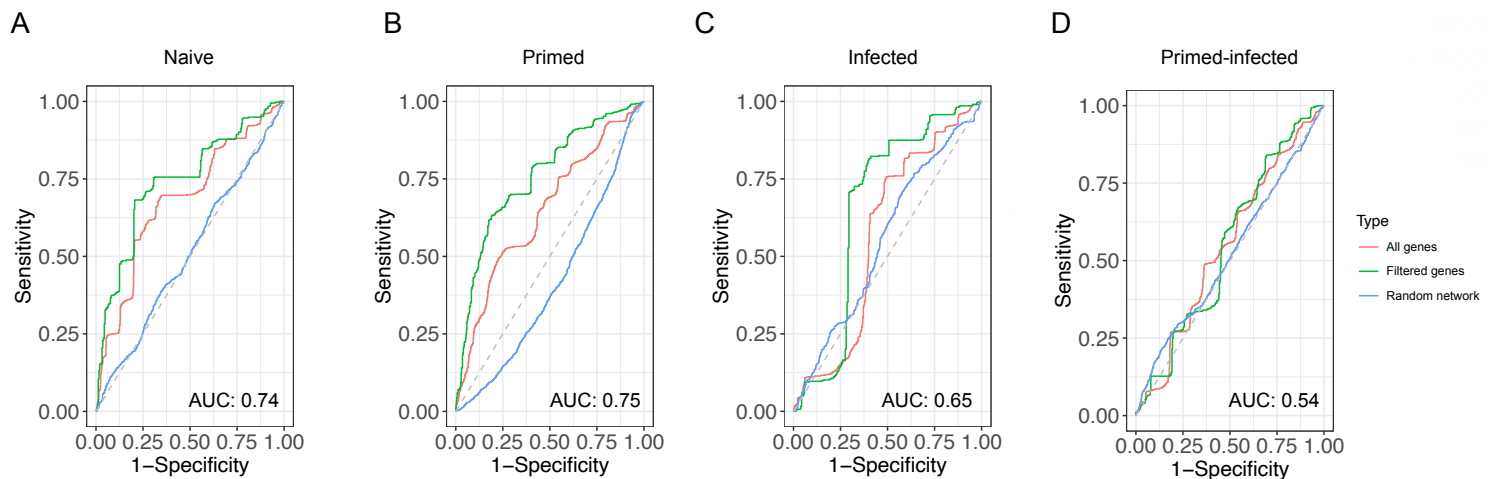

**Appendix Figure S13:** Output of GRaNPA for classification of direction of differential expression data for different macrophage eGRNs (identical to **Fig. S12**, just showing the receiver operating characteristic - ROC - curve instead). For more details, see the caption for **Fig. S12**.

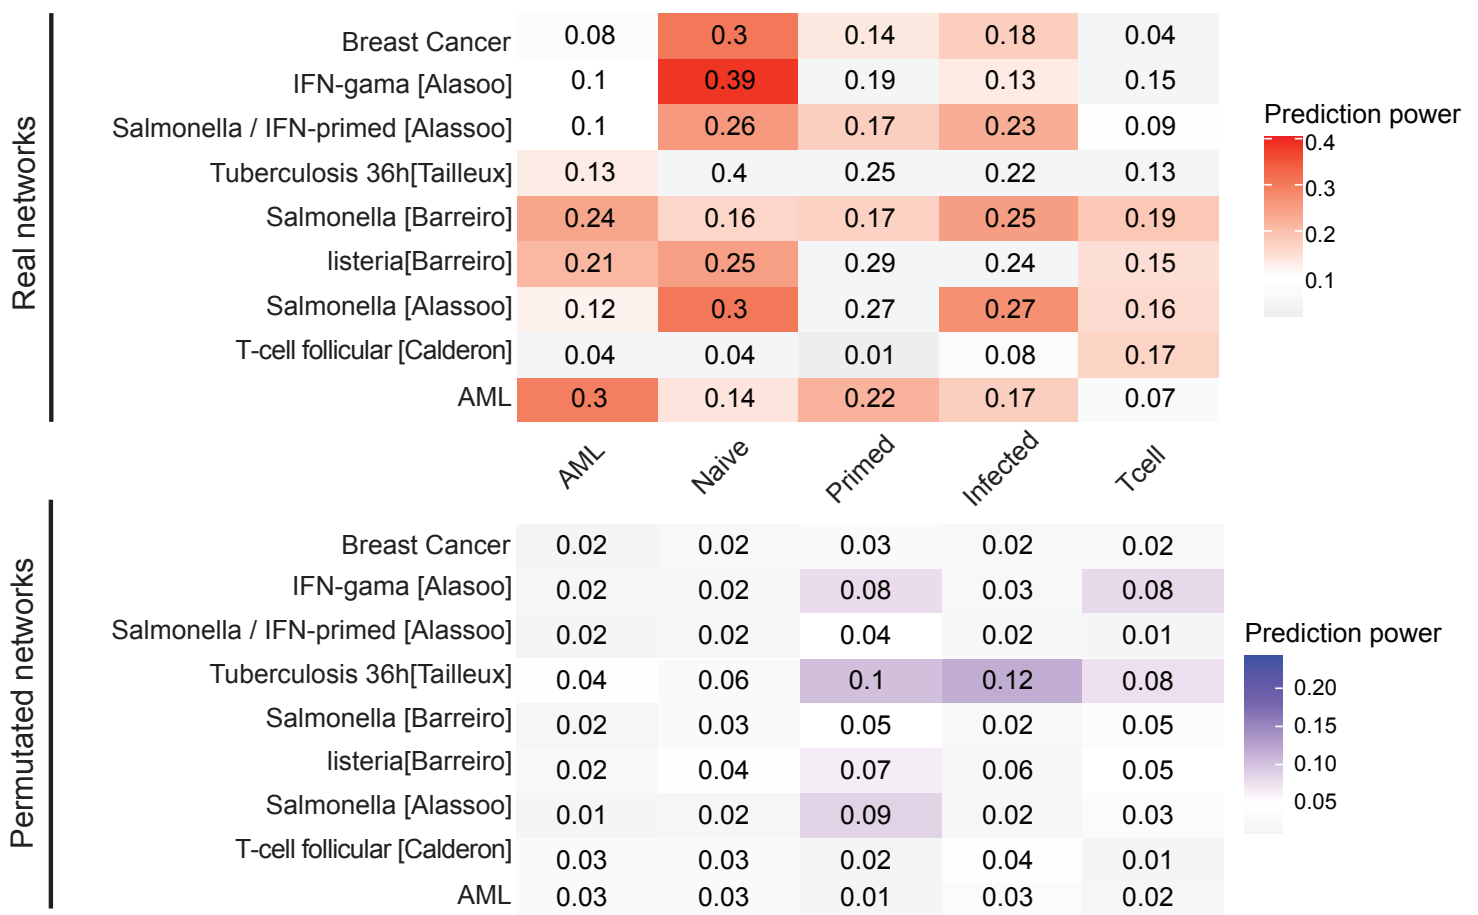

**Appendix Figure S14:** Output of GRaNP (mean R2 across 10 random forest runs) using a modified model where expression variation is included as gene-specific feature. Expression variation is calculated based on GTEX data. The R-squared values are shown for predicting the differential expression response in nine distinct perturbations (rows) with distinct GRaNP-inferred eGRNs (columns; top) and with the respective random networks (columns, bottom). eGRNs that show a performance > 0.05 with the random eGRN (bottom) are colored in grey for the real network (top).

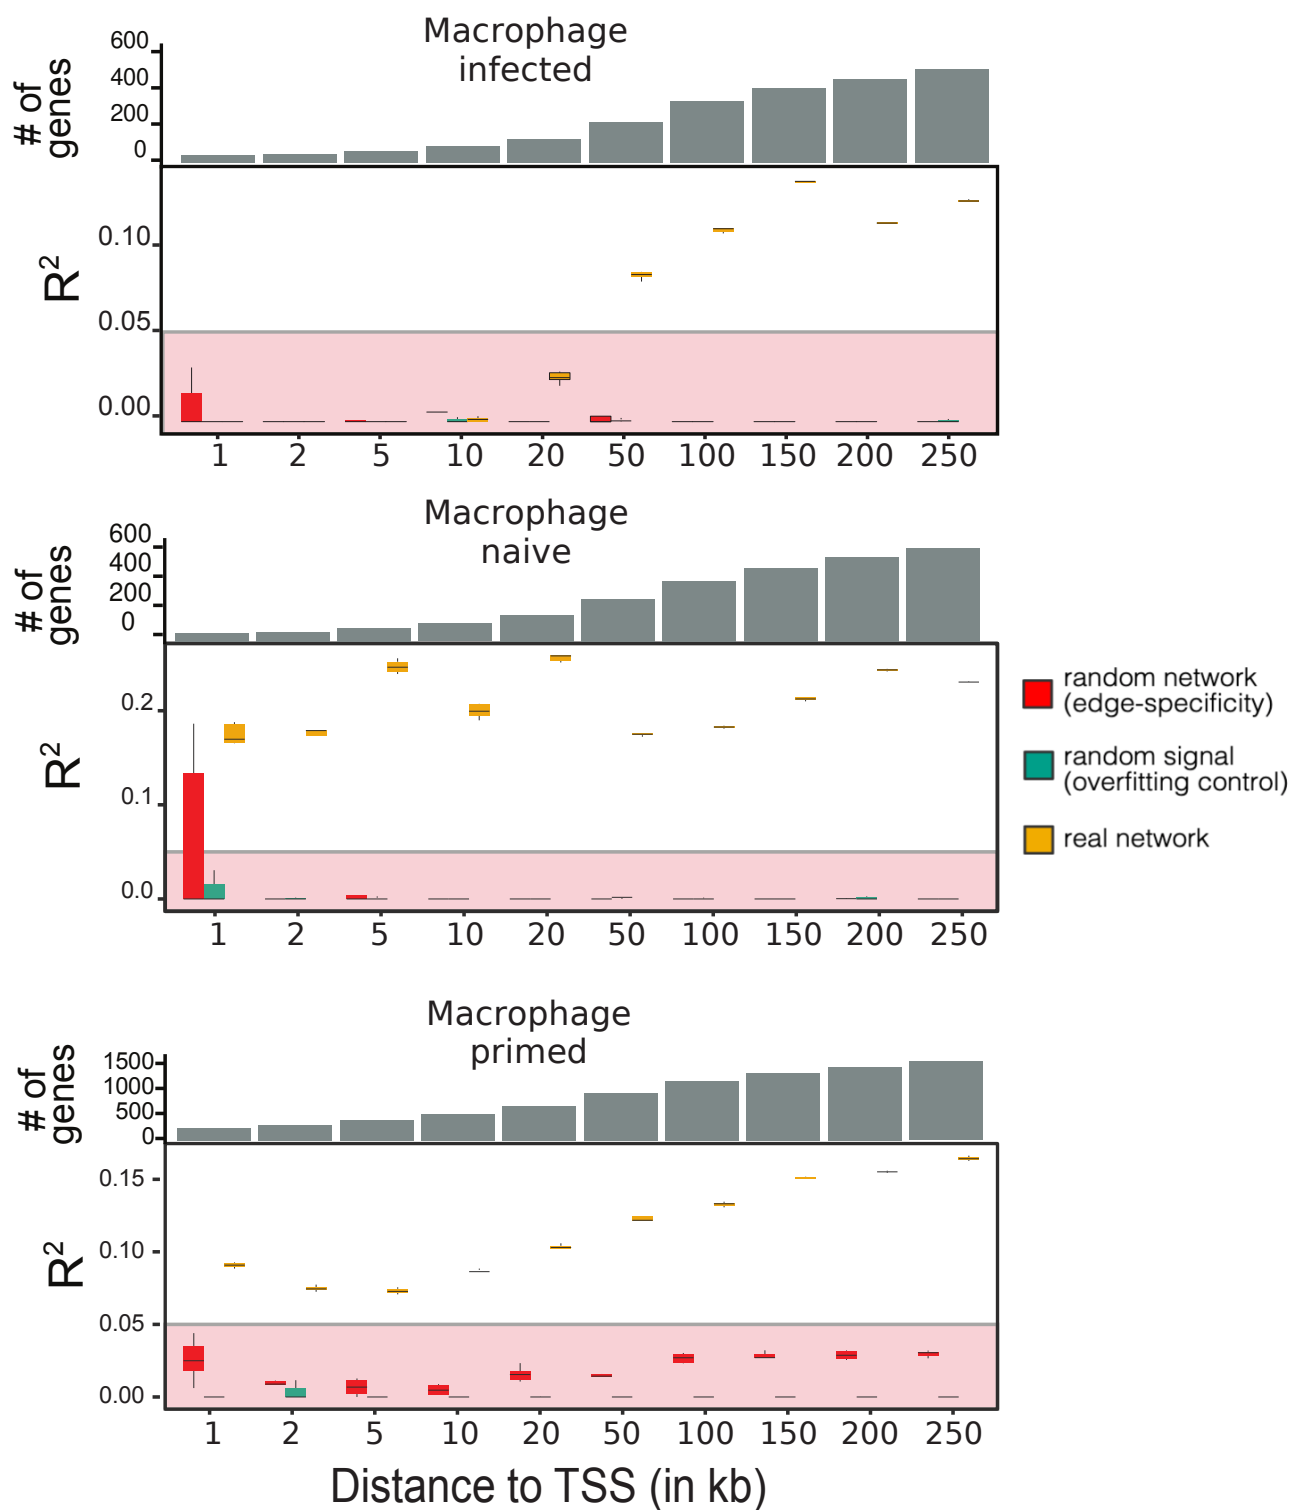

**Appendix Figure S15 :** GRaNP evaluation of subnetworks stratified by gene-enhancer distance for the eGRNs from infected, naive and primed macrophages (top to bottom) using differential expression between *Salmonella* infection after 5h and naive macrophages. For any particular distance threshold  $k$ , the subnetwork consists of all connections with a gene-enhancer distance of 0 to  $k$ .

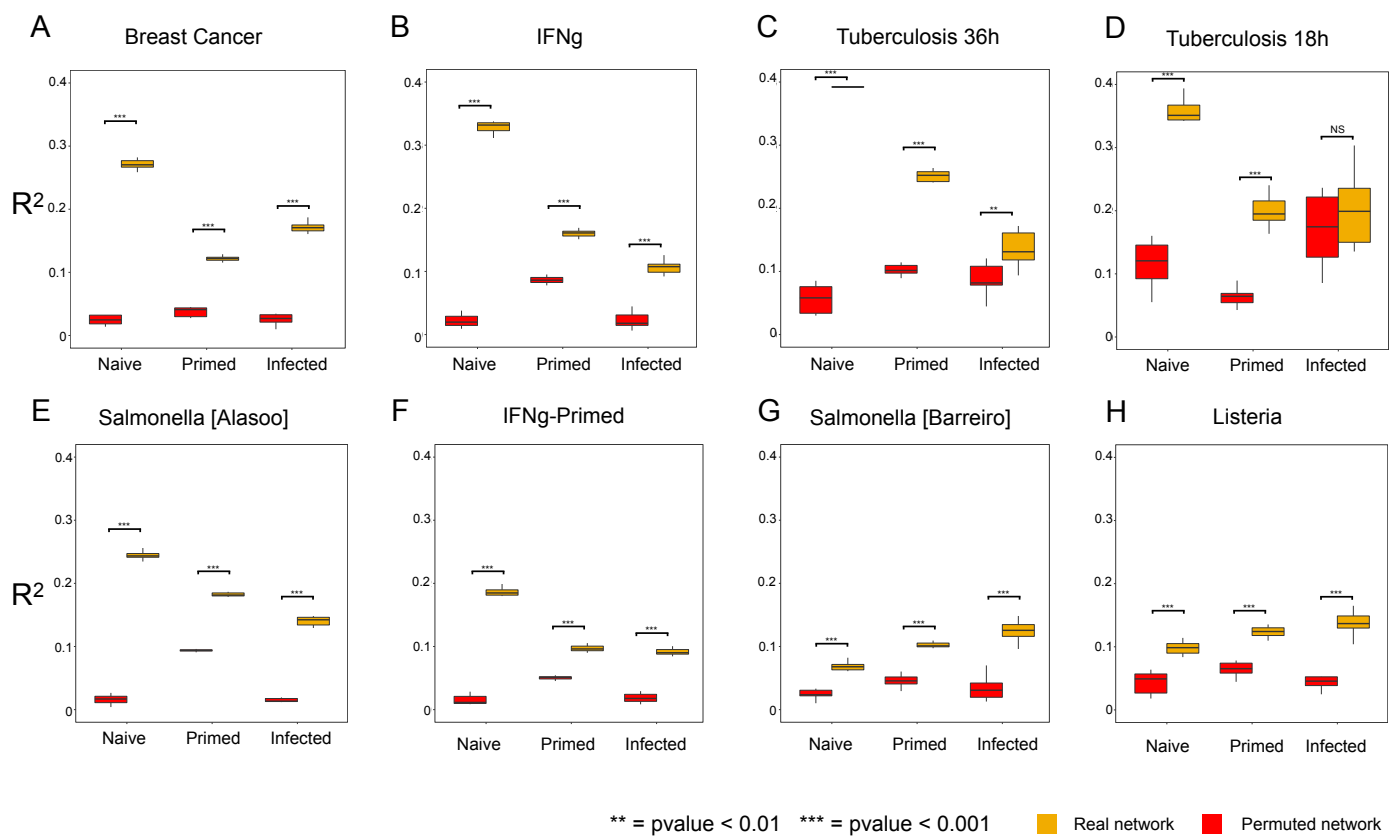

**Appendix Figure S16:** GRankPA evaluation of naive (left), primed (middle), infected (left) eGRNs across seven conditions of macrophage differential expression response. Overall, the naive and the naive-infected eGRNs were able to predict the differential expression response to most conditions ( $R^2 > 0.1$  and  $R^2 < 0.05$  for the respective random networks), while the primed network failed the specificity control for some. Since naive and infected eGRNs both showed high predictive power in these settings, we assessed the pathogen response using the union of the naive and infected macrophage eGRNs (**Fig. 4A**).

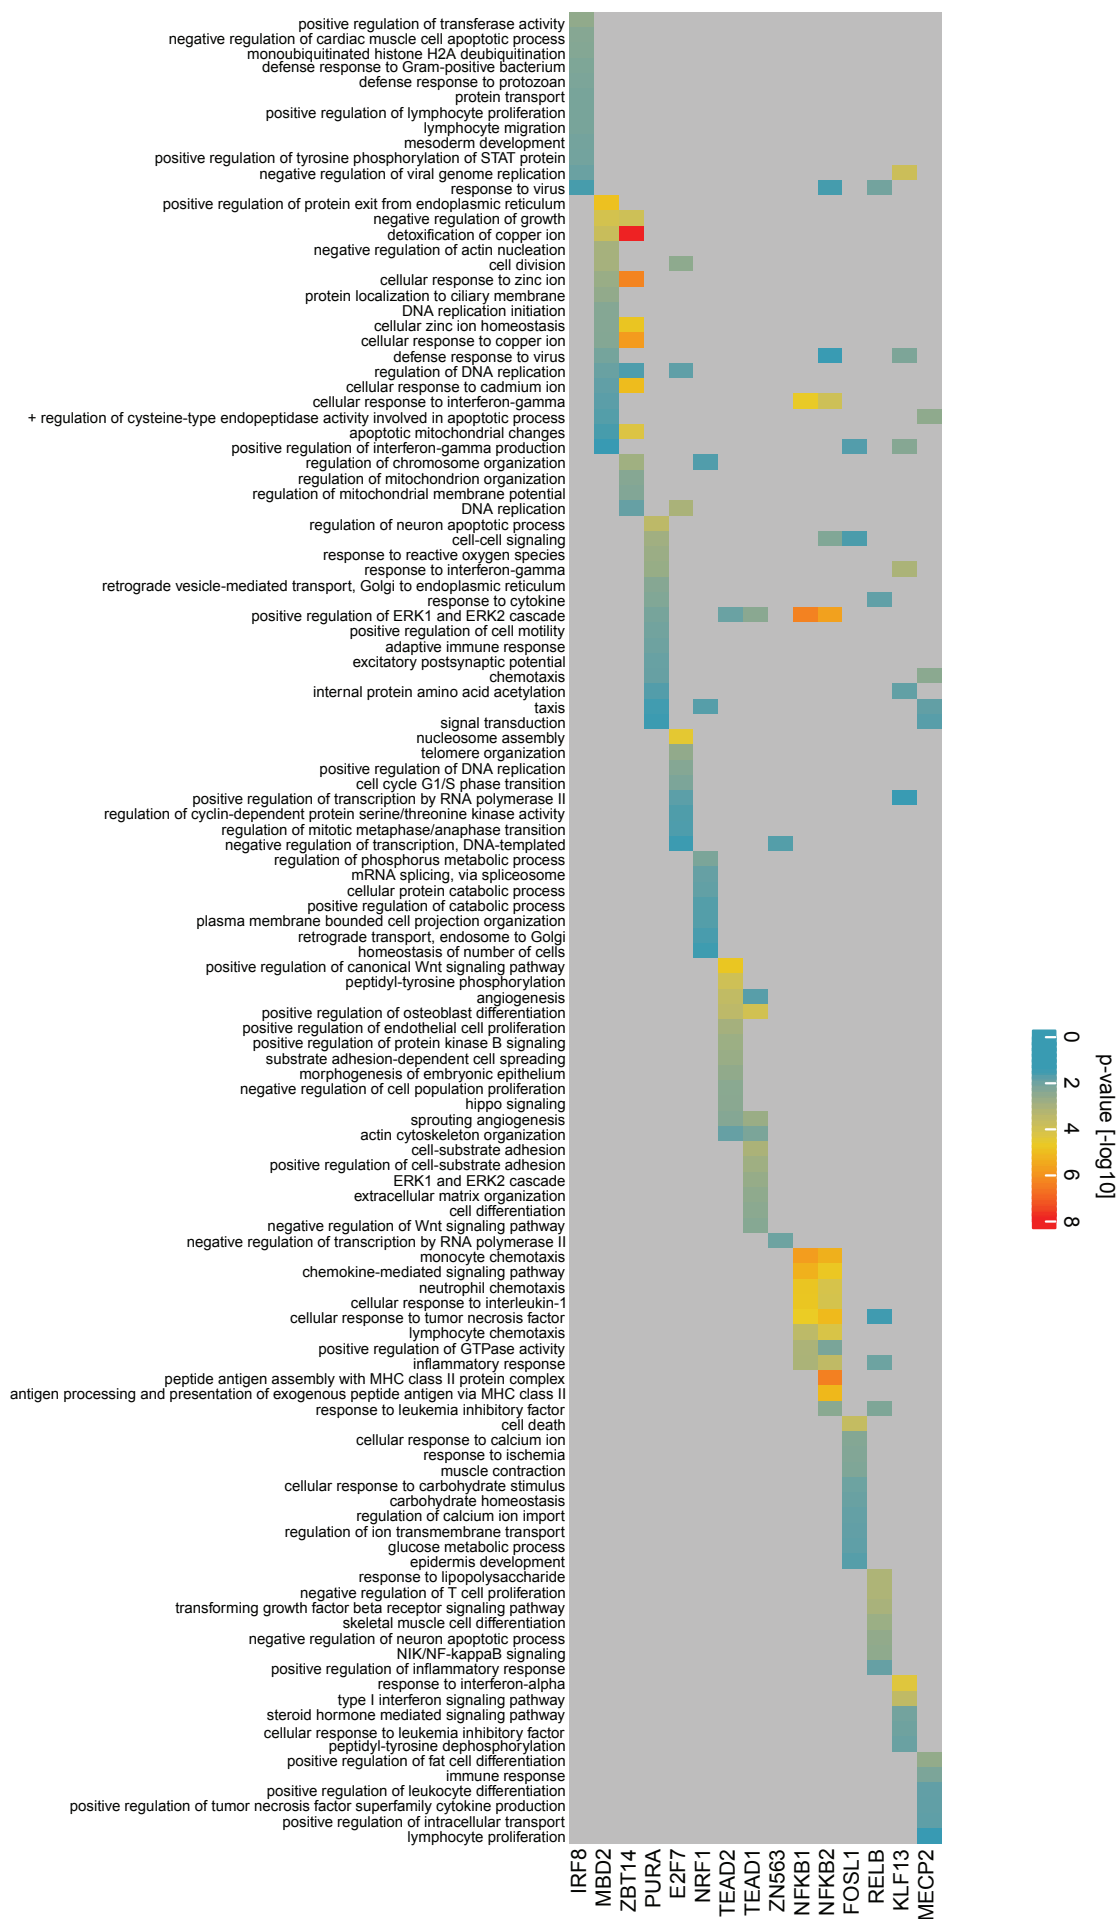

**Appendix Figure S17:** GO enrichment analysis of the regulons of the 15 most important TFs across all conditions (as implemented in GRaNIE) in the union (naive+infected) macrophage eGRN revealed that each TF is associated with very specific terms, likely reflecting different defence mechanisms triggered by the pathogens.

## Salmonella

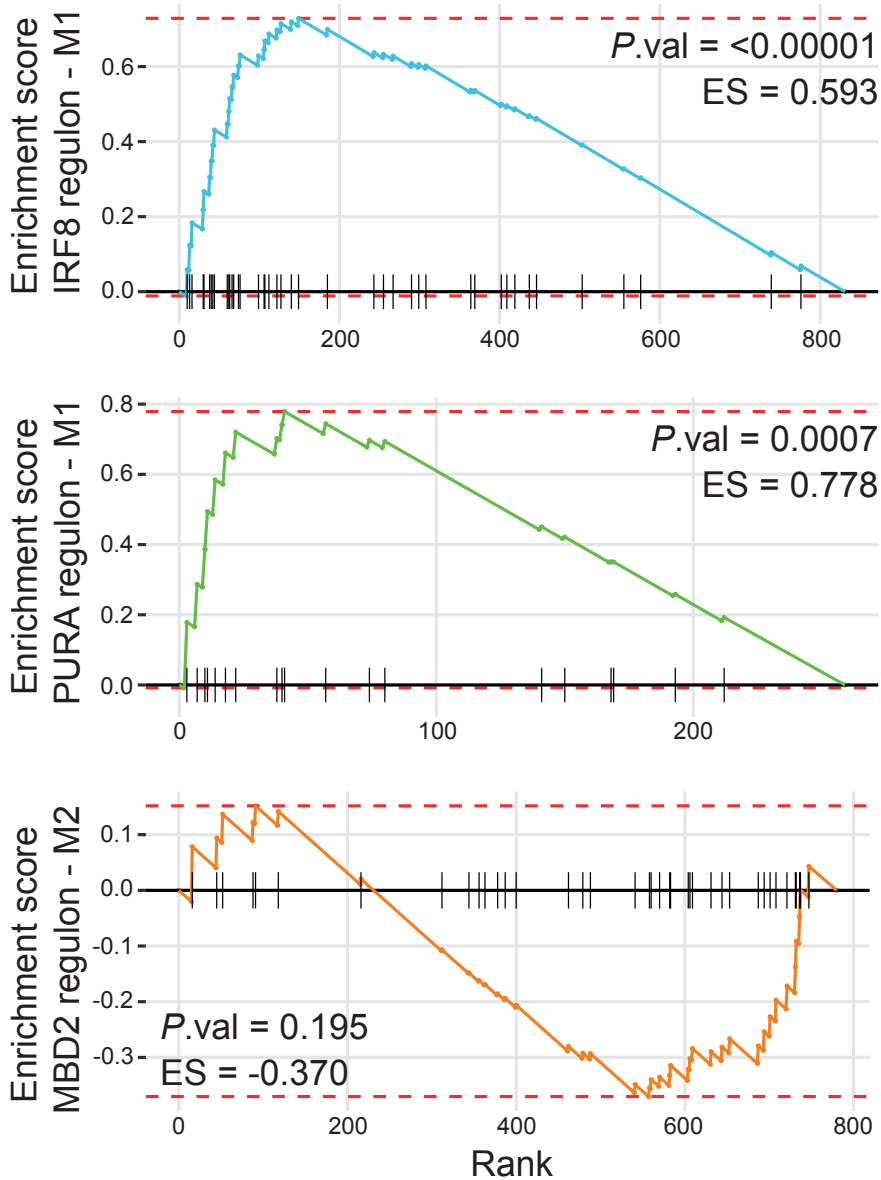

**Appendix Figure S18.** GSEA of genes included in the IRF8 (top, blue), PURA (middle, green), and MBD2 (bottom, orange) regulons from the union of the naive and infected macrophage eGRNs, that were differentially expressed ( $P_{adj} < 0.05$ ) in salmonella infected macrophages versus control. Genes were ranked based on log2 fold-change (x-axis). Enrichment score is depicted as colored lines (y-axis), and vertical black bars below indicate the position of M1 associated genes for IRF8 and PURA, and M2 associated genes for MBD2. ES = normalized enrichment score,  $P.val$  = p-value.

### Enrichment union GRN

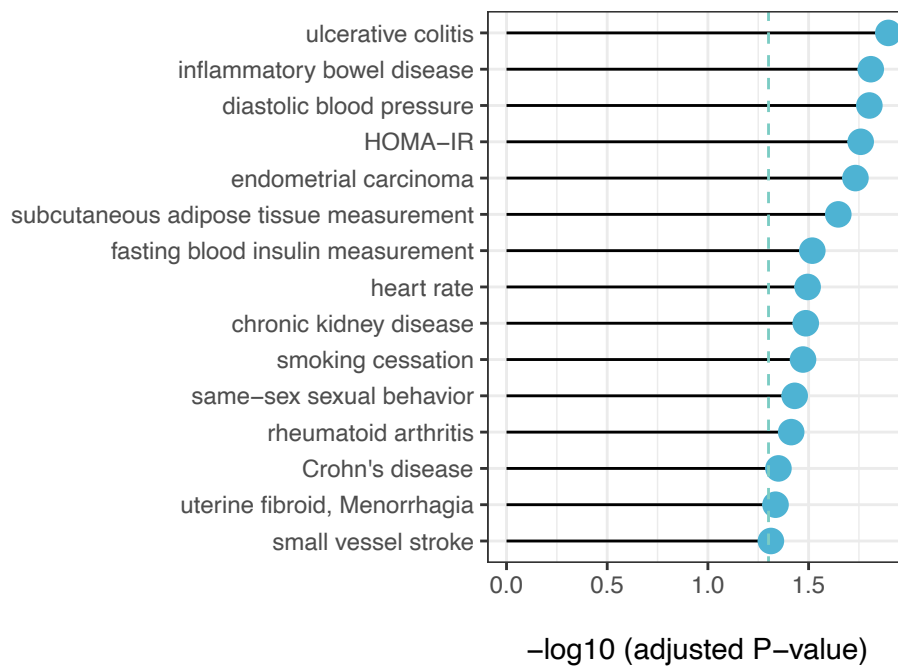

**Appendix Figure S19:** Lollipop plot of LDSC enrichment p-values. GWAS traits that attained a nominal P-value  $< 0.05$  for enrichment of heritability in the enhancer regions connected either NFkB1/2, RELB, or IRF8 in the union of the three macrophage eGRNs are displayed.

A

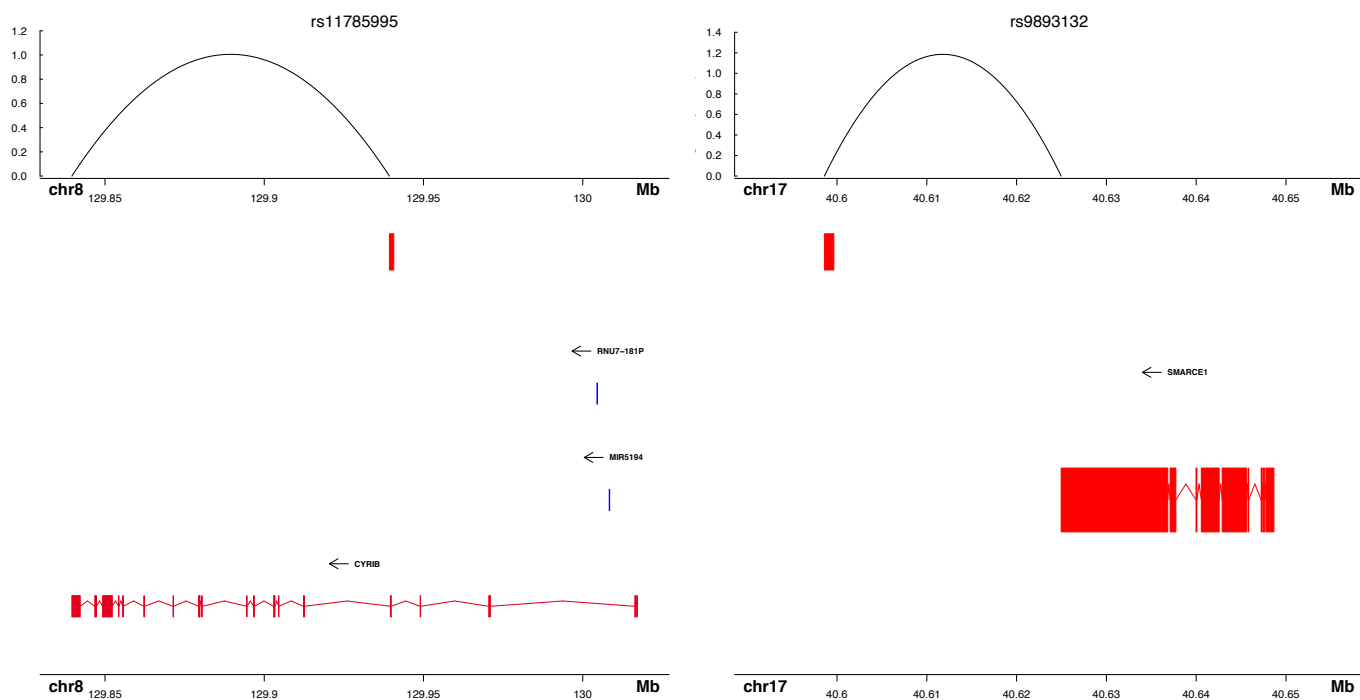

# B

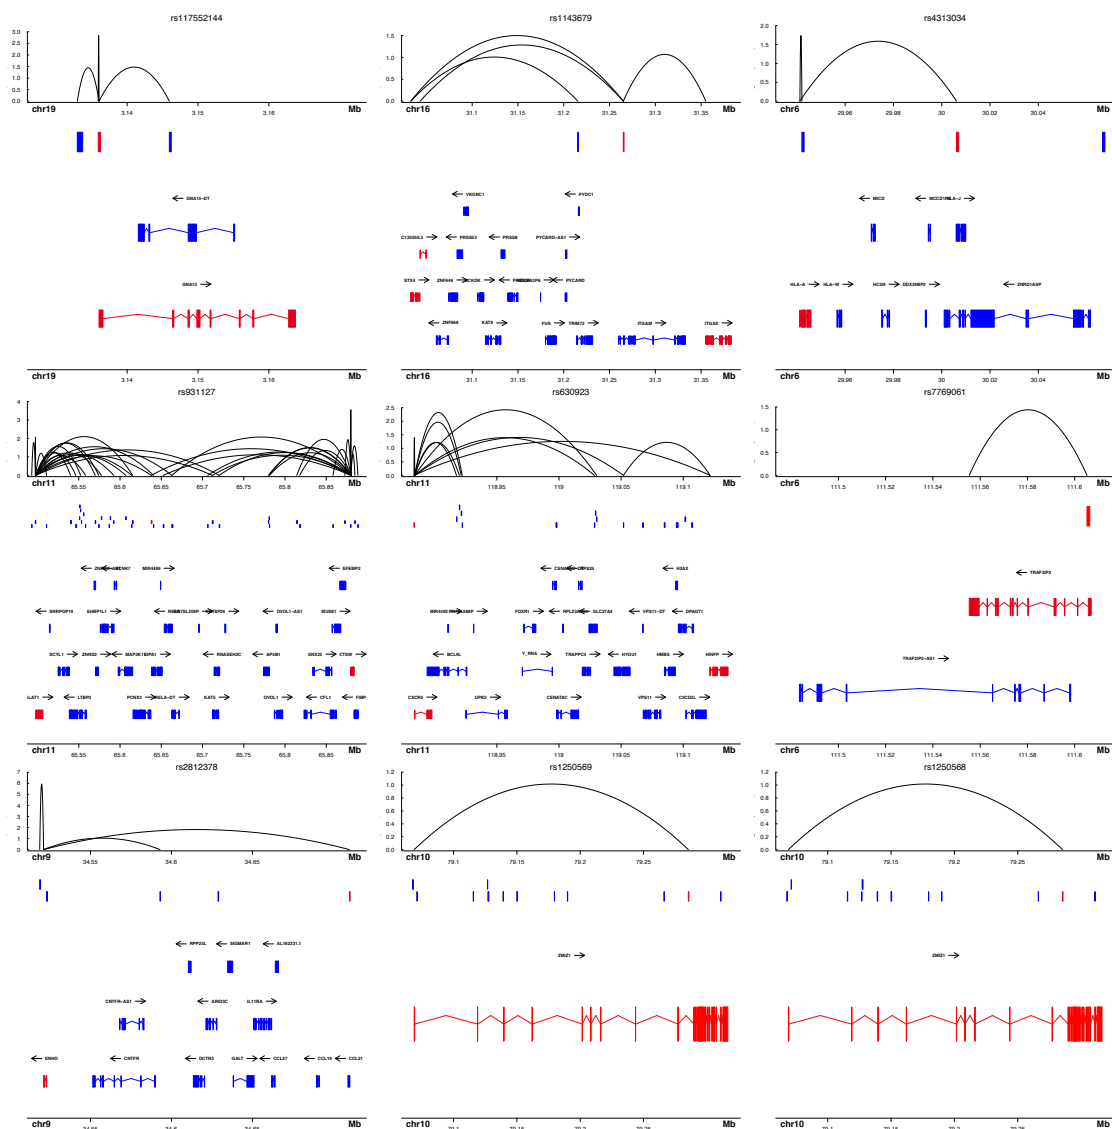

C

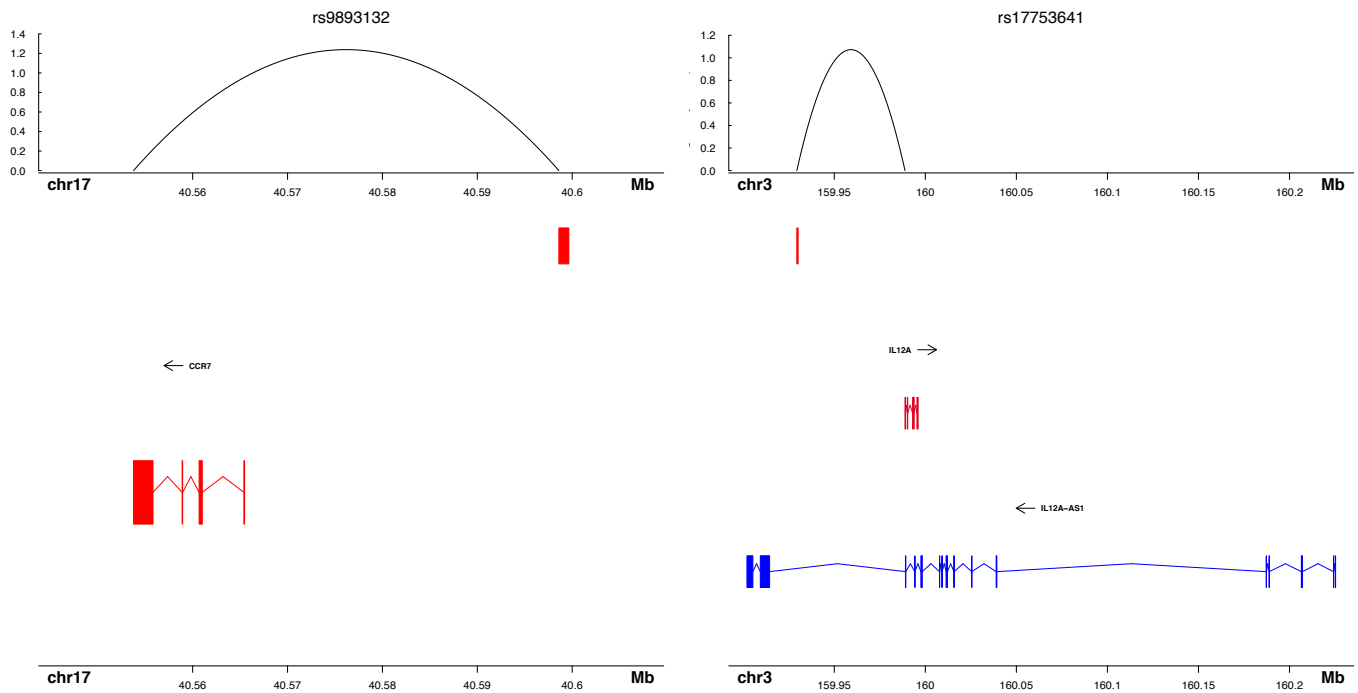

**Appendix Figure S20:** The genomic context of all 11 fine-mapped variants in ATAC-seq peaks are shown in the naive (**A**), primed (**B**), and infected (**C**) macrophage eGRNs. The context includes gene tracks, other peaks present in the infected macrophage eGRN (blue boxes), and peak-gene links (arcs). Genes targeted by the peak overlapping with the SNP (red box) are colored in red.
